# Supplementary material for: Optimizing ultrathin Ag films for high performance oxide-metal-oxide flexible transparent electrodes through surface energy modulation and template-stripping procedures
Source: PubMed Central journal article supplement (PMC5349598; doi:10.1038/srep44576), 2017-03-14
Supplement: srep44576-s1.pdf [file srep44576-s1.pdf]

# Supporting Information

## **Optimizing ultrathin Ag films for high performance oxide-metal-oxide flexible transparent electrodes through surface energy modulation and template-stripping procedures**

Xi Yang<sup>1</sup>, Pingqi Gao<sup>1</sup>, Zhenhai Yang<sup>1</sup>, Juye Zhu<sup>1</sup>, Feng Huang<sup>1</sup>, Jichun Ye<sup>1</sup>

<sup>1</sup>Ningbo Institute of Material Technology and Engineering, Chinese Academy of Sciences, Ningbo 315201, China

e-mail: gaopingqi@nimte.ac.cn; jichun.ye@nimte.ac.cn

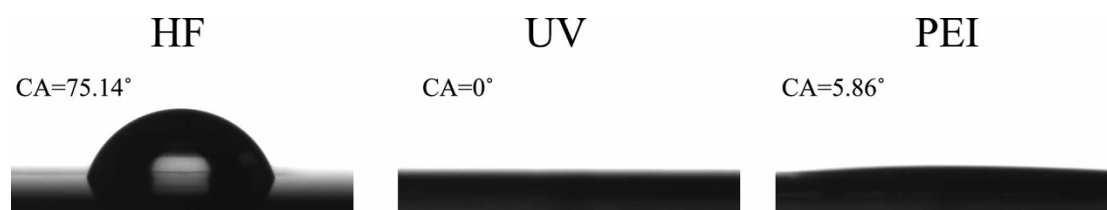

**Supplementary Figure S1.** Photographs of water droplets on the surfaces of substrates treated by HF, UV and PEI, respectively.

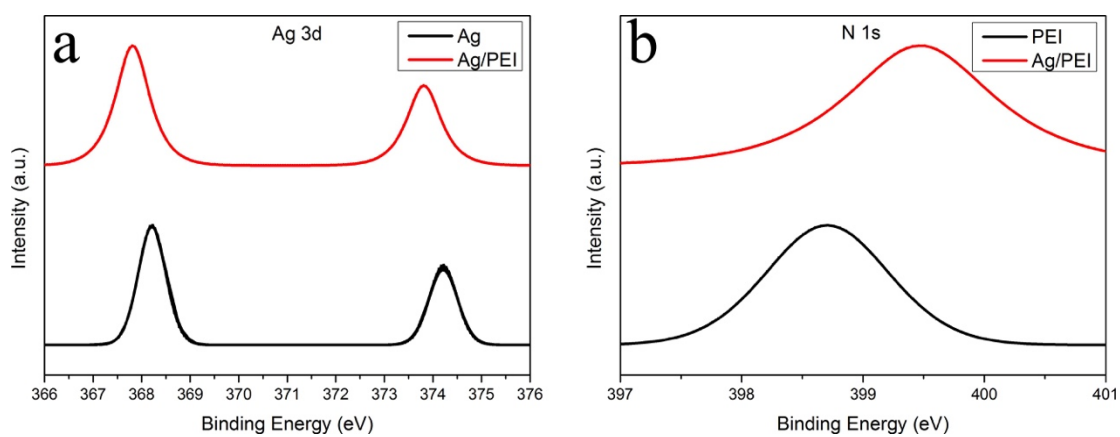

**Supplementary Figure S2.** High-resolution XPS data of the bare-Ag, Si substrate immediately after PEI treatment, and Ag coated on PEI treated Si (Ag/PEI) samples: **(a)** Ag 3d, and **(b)** N 1s.

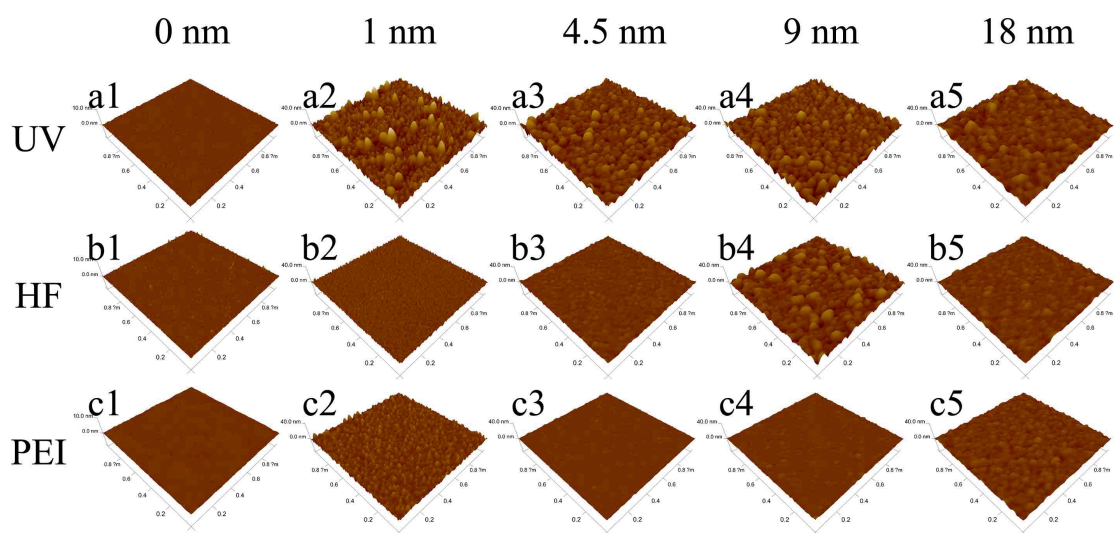

**Supplementary Figure S3.** 3-dimensional AFM images of various thickness of Ag on substrates treated by **(a1) - (a5)** UV, **(b1) - (b5)** HF and **(c1) - (c5)** PEI, respectively.

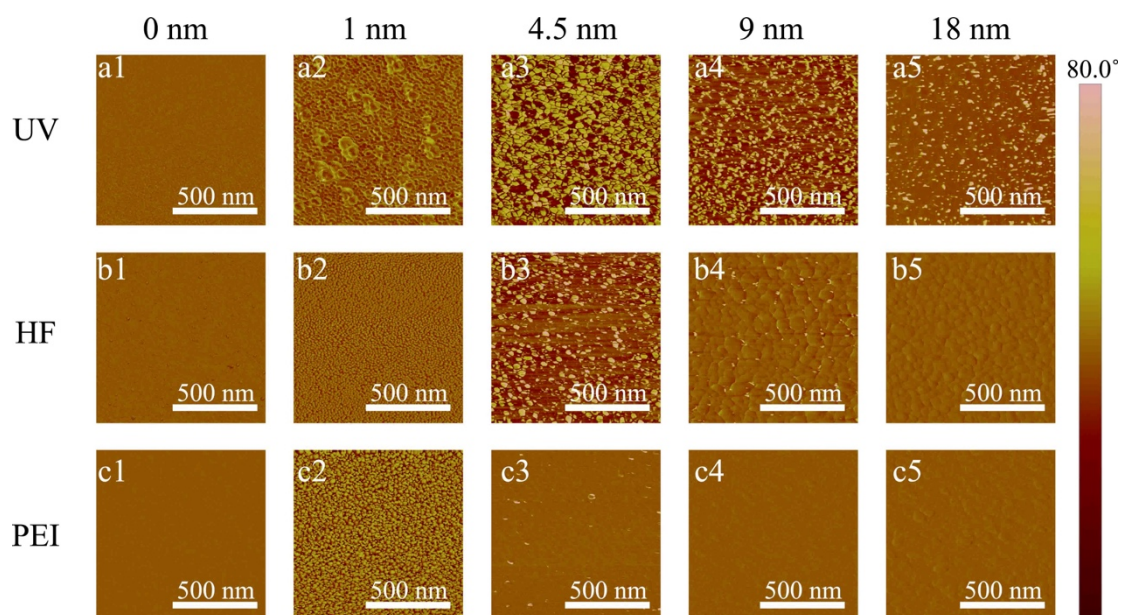

**Supplementary Figure S4.** AFM phase images of various thickness of Ag on substrates treated by **(a1) - (a5)** UV, **(b1) - (b5)** HF and **(c1) - (c5)** PEI, respectively.

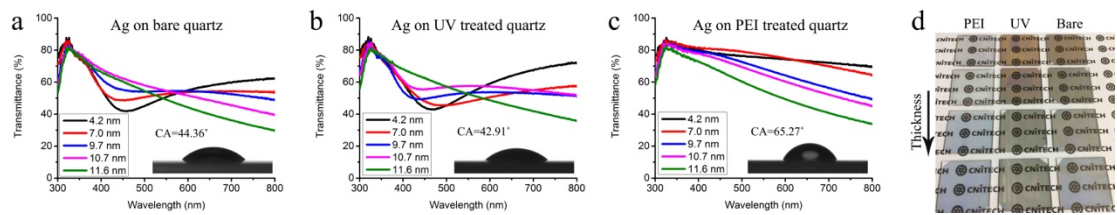

**Supplementary Figure S5. (a)-(c)** Optical transmittance spectra and **(d)** photographs of various thickness of Ag film on quartz substrates that were pre-treated by different procedures. The inset depicts photograph of water droplet on the surface of substrate.

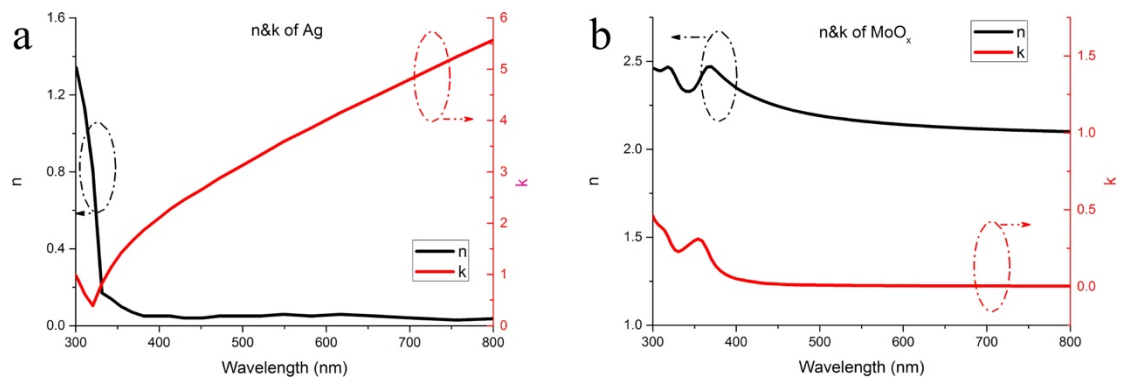

**Supplementary Figure S6.** Refractive indexes of **(a)** Ag and **(b)** MoO<sub>x</sub> used in simulation.

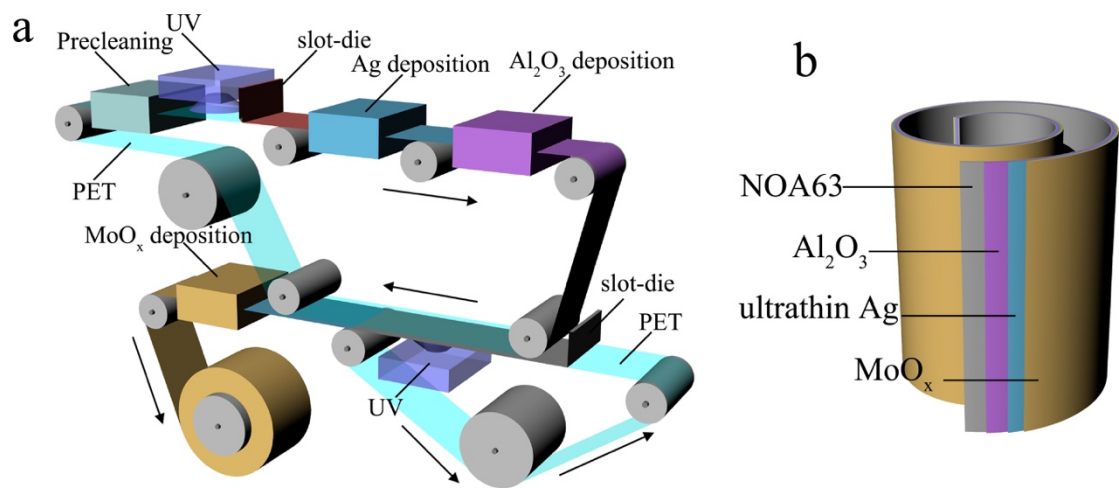

**Supplementary Figure S7.** Diagrams for the fabrication process of the large-area AAM based TCEs. **(a)** Continuous roll-to-roll sputtering system to fabricated AAM based TCEs. **(b)** Structure of the fabricated AAM based TCEs.



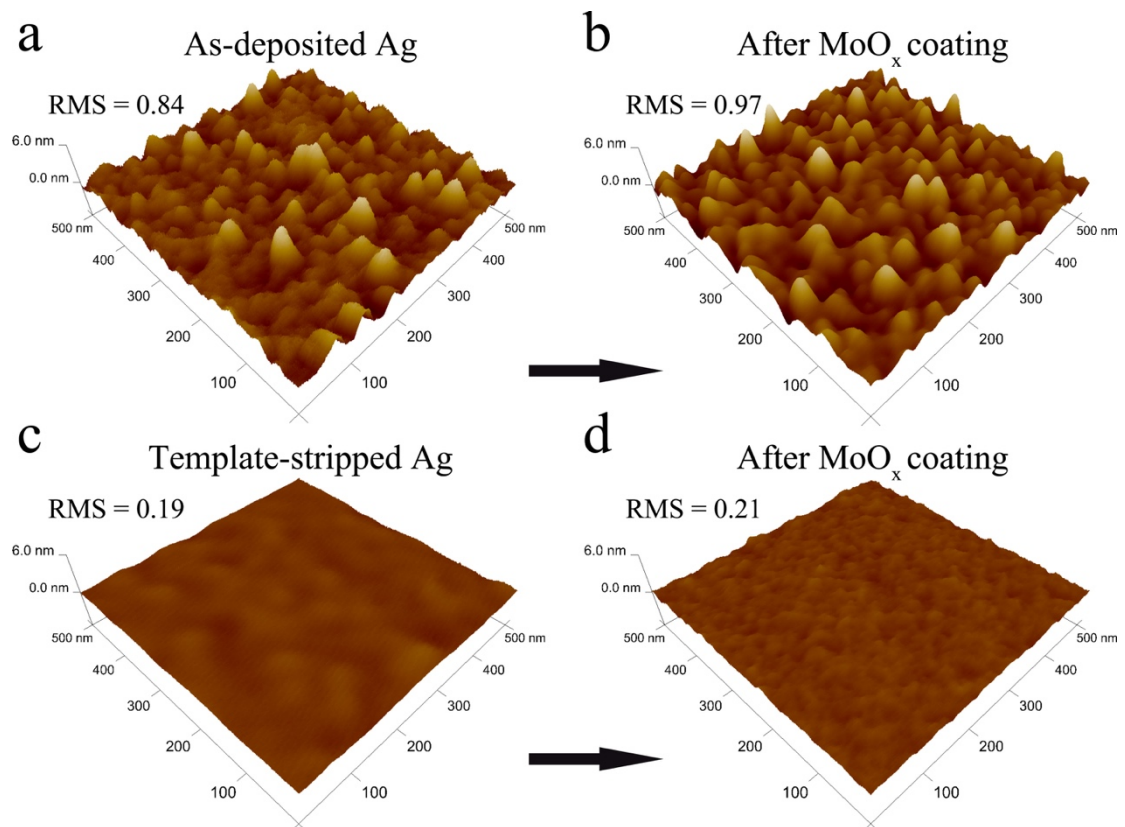

**Supplementary Figure S8.** AFM topography images of of as-deposited and template-stripped Ag film before and after MoO<sub>x</sub> layer coating.

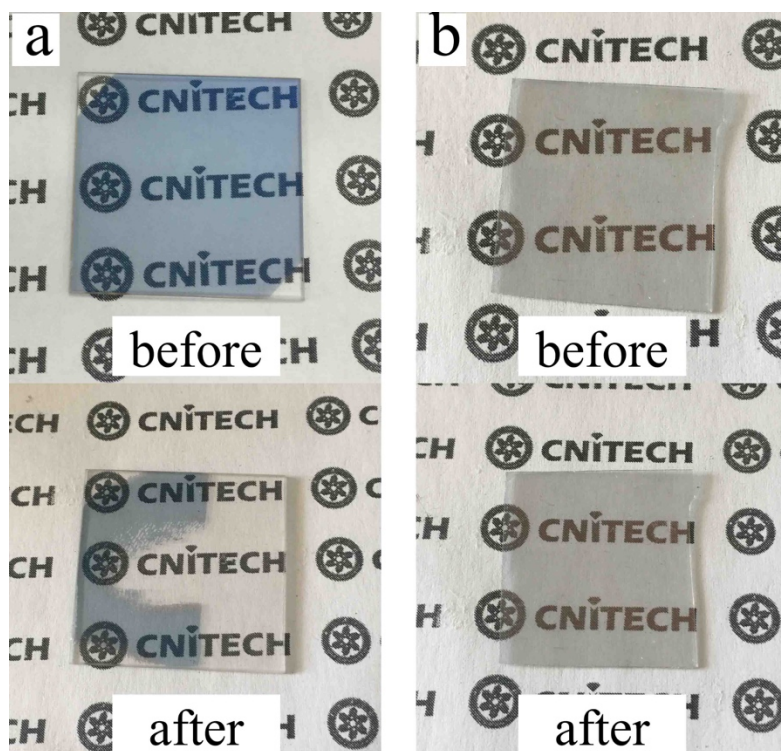

**Supplementary Figure S9.** Photographs of (a) as-deposited ultrathin Ag film and (b) template-stripped Ag film before (up) and after (down) the scraping test.

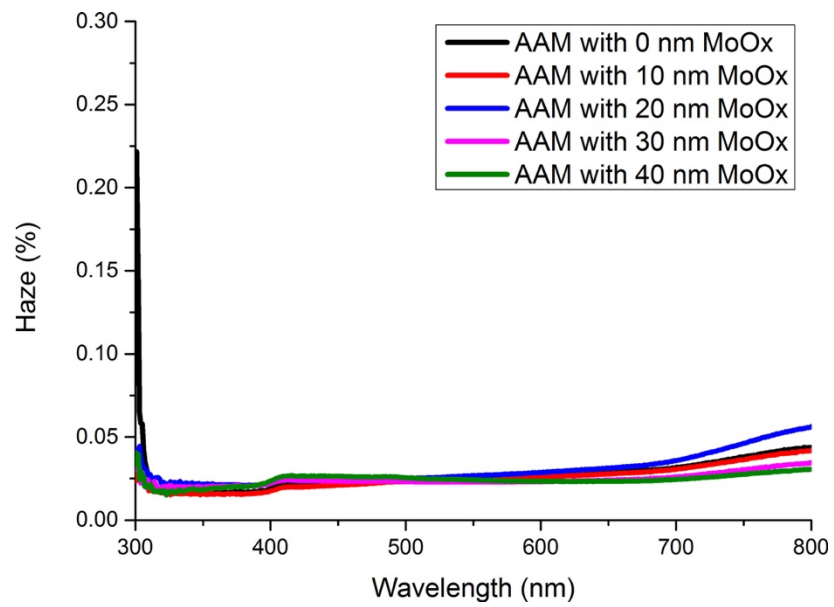

**Supplementary Figure S10.** The haze curves of the AAM films with various thickness of MoO<sub>x</sub> layer.
